**Integrated Plasma and Tissue Proteomics Reveals  
Attractin Release by Intraluminal Thrombus of Abdominal Aortic Aneurysms  
and Improves Aneurysm Growth Prediction in Humans**

Regent Lee<sup>1,2</sup>, Ismail Cassimee<sup>2</sup>, Honglei Huang<sup>1,2</sup>, Pierfrancesco Lapolla<sup>1</sup>,  
Anirudh Chandrashekar<sup>1</sup>, Philip Charles<sup>2</sup>, Benedikt Kessler<sup>2</sup>, Roman Fischer<sup>2</sup>, Ashok Handa<sup>1</sup>

<sup>+</sup>On behalf of the Oxford Abdominal Aortic Aneurysm Study

<sup>1</sup>Nuffield Department of Surgical Sciences, University of Oxford, UK

<sup>2</sup>Target Discovery Institute, Nuffield Department of Medicine, University of Oxford, UK

**Corresponding Author**

Regent Lee  
regent.lee@nds.ox.ac.uk

**Keywords:** abdominal aortic aneurysm, attractin,  
protein biomarkers, growth rate prediction

1 Abdominal aortic aneurysms (AAAs) are pathological dilatation of the abdominal aorta to  
2 larger than 30mm in diameter. Left untreated, it eventually results in AAA rupture and high  
3 mortality. Methods for the prediction of AAA growth is considered as a priority for research  
4 in the opinions of our peers<sup>1</sup>. It can guide different aspects of clinical management in terms  
5 of the frequency of monitoring of AAAs and the optimal timing for surgery.

6 The Oxford Abdominal Aortic Aneurysm (OxAAA) Study has previously reported a method of  
7 AAA growth prediction by incorporating 9 circulating proteins (derived using a commercially  
8 available protein array), flow mediated dilatation of brachial artery (FMD, a physiological  
9 marker of systemic endothelial function), and AAA diameter<sup>2</sup>. We had also observed that  
10 systemic endothelial function (measured by brachial artery FMD) deteriorates during the  
11 natural history of AAA growth and is reversed by AAA repair<sup>3</sup>.

12 Most AAAs contain intra-luminal thrombus (ILT)<sup>4</sup>. Since ILT is either removed or excluded  
13 from circulation after successful repair of AAAs, we hypothesise that ILT is the source of  
14 mediators that contribute to AAA growth. In this report, we utilised mass spectrometry  
15 analyses on blood, thrombus tissue, and tissue supernatant collected from patients during  
16 the natural history of AAA progression to discover novel predictors of AAA growth in  
17 humans.

18 Details regarding the OxAAA study cohort and recruitment process have been published<sup>3</sup>. In  
19 brief, this prospective study (Ethics Ref: 13/SC/0250) recruited patients in the National  
20 Health Service setting. Baseline assessments were performed. In addition to the  
21 measurement of AAA antero-posterior diameter by ultrasound imaging, fasting blood  
22 sample was collected and Platelet-poor plasma was prepared using two-staged  
23 centrifugation as previously described<sup>5</sup> and stored at -80°C for subsequent analysis.

24 Prospective AAA annual growth rates were calculated based on the diameter measurements  
25 in the subsequent AAA monitoring ultrasound scans.

26 Plasma samples were collected at baseline and at 1 year from each patient (n=59). Based on  
27 the prospectively recorded aneurysm growth rates, we selected a subset of patients [fastest  
28 (n=10) vs slowest (n=10)]. These were pooled for the initial discovery analysis. Plasma  
29 samples were also collected before and at 10-12 weeks after surgery from each patient  
30 (n=29). *Paired* aneurysm wall, ILT, omental biopsies were collected intra-operatively during  
31 open surgical repair (n=3). In addition to analyses of the tissue, supernatant was obtained  
32 from *ex vivo* culture of these paired tissue samples. We utilised a similar approach for  
33 plasma biomarker discovery as recently described<sup>6</sup>. Samples were subjected to Liquid  
34 Chromatography Tandem Mass Spectrometry (LC-MS/MS) proteomic analysis to discover  
35 protein level differences<sup>6</sup>. LC-MS/MS data were analysed using the Progenesis Q1 software  
36 (NonLinear Dynamics), and included only proteins with at least two matched peptide  
37 sequences.

38 The median AAA size at baseline was 48 mm. The median growth rate of AAA was 3.8%/year  
39 (IQR 1.9% to 6.8%). Comparison between patients with the fastest vs the slowest AAA  
40 growth showed 116 proteins (listed by the UniProt Protein IDs in Figure Panel 1) to be  
41 differentially expressed in their plasma (Figure panel 2-A). Among these proteins, 35 also  
42 changed significantly before and after AAA repair (Figure panel 2-B), suggesting their origin  
43 from the AAA complex. Comparison of the proteomics profile of aneurysm tissue, ILT, and  
44 omental artery show 128 proteins to be uniquely present in ILT (Figure panel 2-C).

45 Analyses of the tissue culture supernatant further revealed 3 proteins that were: (i) uniquely  
46 present in ILT; (ii) released by ILT; (iii) reduced in systemic circulation after AAA surgery; (iv)

47 different between fast and slow growth AAAs (Figure panel 2-D). These are: attractin  
48 (UniProt ID O75882), complement C8 (UniProt ID P07360), heat shock protein AA5P (UniProt  
49 ID Q58FG0). To technically validate the LC-MS/MS data, attractin level in individual patient  
50 was measured by ELISA (R&D Quantikine DATRN0). Consistent with the LC-MS/MS data,  
51 plasma attractin level is significantly higher in patients with fast AAA growth (Figure panel 3,  
52 median 28.5 vs 21.9 ng/ml,  $P < 0.001$ ). Plasma attractin level correlates significantly with  
53 future AAA growth rate (Figure panel 4, Spearman  $r = 0.35$ ,  $P < 0.005$ ).

54 We tested the utility of a generalised linear model to predict aneurysm growth in these  
55 patients. We regressed the measured values of attractin in combination with the  
56 measurements of AAA diameter against a categorical response with levels of 'Slow/no'  
57 growth (0%) or growth (>0% growth) for outcomes at 12 months. Using attractin and AAA  
58 diameter as input variables, the area under receiver operating characteristics (AUROC) for  
59 predicting no growth of AAA at 12 months is 85% (Figure panel 5, asymptotic  $P < 0.001$ ) as  
60 compared to 76% with AAA diameter alone.

61 This report is a significant breakthrough from our previous work<sup>2</sup>. By focusing on the role of  
62 thrombus as a source of systemic mediator release, we discover novel proteins that are  
63 released from thrombus and drive AAA growth in humans, tested in a prospectively  
64 recruited cohort. This is the first report in which novel proteins that correlate to future AAA  
65 growth have been discovered through a mass spectrometry workflow. The validity of the  
66 mass spectrometry discovery workflow is demonstrated by the precise replication of the LC-  
67 MS/MS data by ELISA measurements on individual patient samples.

68 Since the first description of attractin in 1998<sup>7</sup>, there has been little in the reported  
69 literature regarding its biological role in disease. Evidence points toward its release by

70 activated T-cell. It is involved in the initial immune cell clustering during inflammatory  
71 response and it regulates chemotactic activity of chemokines<sup>7</sup>. There is mounting evidence  
72 of T-cells being active in AAA ILT and that it plays a role in AAA pathophysiology<sup>8</sup>. This report  
73 is the first to implicate attractin in human AAA progression and warrants further  
74 mechanistic investigations.

75 It is important for external cohorts to replicate the efficacy of our biomarker panel. We  
76 hope this work serves as a primer to generate interest in the vascular surgical community  
77 and stimulates future efforts to validate the prediction algorithm.

78 **References**

79

80 1. Lee R, Jones A, Cassimjee I and Handa A. International opinion on priorities in research for  
81 small abdominal aortic aneurysms and the potential path for research to impact clinical  
82 management. *Int J Cardiol.* 2017;245:253-255.

83 2. Lee R, Charles PD, Lapolla P, Cassimjee I, Huang H, Kessler B, Fischer R and Handa A.  
84 Integrated Physiological and Biochemical Assessments for the Prediction of Growth of Abdominal  
85 Aortic Aneurysms in Humans. *Ann Surg.* 2018.

86 3. Lee R, Bellamkonda K, Jones A, Killough N, Woodgate F, Williams M, Cassimjee I and Handa  
87 A. Flow Mediated Dilatation and Progression of Abdominal Aortic Aneurysms. *Eur J Vasc Endovasc*  
88 *Surg.* 2017;53:820-829.

89 4. Whaley ZL, Cassimjee I, Novak Z, Rowland D, Lapolla P, Chandrashekar A, Pearce BJ, Beck  
90 AW, Handa A and Lee R. The Spatial Morphology of Intraluminal Thrombus Influences Type II  
91 Endoleak After Endovascular Repair of Abdominal Aortic Aneurysms. *Ann Vasc Surg.* 2019.

92 5. Lee R, Antonopoulos AS, Alexopoulou Z, Margaritis M, Kharbanda RK, Choudhury RP,  
93 Antoniadis C and Channon KM. Artifacts of elevation of plasma sCD40L by residual platelets in  
94 patients with coronary artery disease. *Int J Cardiol.* 2013;168:1648-50.

95 6. Lee R, Fischer R, Charles PD, Adlam D, Valli A, Di Gleria K, Kharbanda RK, Choudhury RP,  
96 Antoniadis C, Kessler BM and Channon KM. A novel workflow combining plaque imaging, plaque  
97 and plasma proteomics identifies biomarkers of human coronary atherosclerotic plaque disruption.  
98 *Clin Proteomics.* 2017;14:22.

99 7. Duke-Cohan JS, Tang W and Schlossman SF. Attractin: a cub-family protease involved in T  
100 cell-monocyte/macrophage interactions. *Adv Exp Med Biol.* 2000;477:173-85.

101 8. Ismail Cassimjee RLJP. Inflammatory Mediators in Abdominal Aortic Aneurysms. 2017.

102

103 **Acknowledgement**

104 The Oxford Abdominal Aortic Aneurysm Study was supported by the following: University of Oxford,  
105 Medical Sciences Division Medical Research Fund (MRF/HT2016/2191); University of Oxford,  
106 Nuffield Department of Surgical Sciences; John Fell Oxford University Press Research Fund  
107 (142/075); National Institute of Health Research (NIHR) Oxford Biomedical Research Centre; British  
108 Heart Foundation Centre of Research Excellence, Oxford (RE/13/1/30181); RL was supported by a  
109 Academy of Medical Science Starter Grant, UK (SGL013/1015). PL was supported by an EU Erasmus+  
110 traineeship studentship. BMK and PDC were supported by a John Fell Oxford University Press  
111 Research Fund (133/075) and a Wellcome Trust Grant (097813/11/Z).

112 \*Contributors to the OxAAA Study include: Amy Jones, Felicity Woodgate, Nicholas Killough, Kirthi  
113 Bellamkonda, Elisha Ngetish, Joel Ward, Members of the Oxford Regional Vascular Services, and the  
114 Jackie Walton Vascular Studies Unit.

Figure

**1.** UniProt ID of proteins that significantly differ between patients with fast vs slow AAA growth

|               |        |               |        |        |        |        |               |        |            |
|---------------|--------|---------------|--------|--------|--------|--------|---------------|--------|------------|
| O00533        | P00746 | P04271        | P0D0X6 | P15311 | P30086 | P55884 | Q14315        | Q7Z3D4 | Q9H361     |
| O00555        | P00915 | P05091        | P0DP01 | P18085 | P31948 | P57721 | Q15084        | Q7Z4W1 | Q9NQH7     |
| O15144        | P01034 | P06576        | P10643 | P20774 | P32119 | P61769 | Q15847        | Q8N436 | Q9NVI1     |
| O43488        | P01764 | P06727        | P10809 | P20851 | P33981 | P61916 | Q16363        | Q8W275 | Q9UNM6     |
| O60641        | P01860 | P07099        | P11142 | P21810 | P35908 | P62306 | Q4VNC0        | Q96SN8 | Q9Y5C1     |
| <b>O75882</b> | P01871 | P07195        | P11168 | P21980 | P42166 | P78371 | <b>Q58FG0</b> | Q96TC7 | Q9Y5Z4     |
| O75891        | P02655 | <b>P07360</b> | P11217 | P23470 | P46821 | Q04637 | Q35MJ70       | Q99497 | A0A0C4DH68 |
| O76013        | P02656 | P07858        | P11309 | P24592 | P48643 | Q12906 | Q5VST9        | Q99879 | A0A0C4DH31 |
| O95568        | P02741 | P07988        | P13500 | P27348 | P49458 | Q13093 | Q6IMN6        | Q99943 |            |
| O95782        | P02771 | P08133        | P13645 | P27797 | P50990 | Q13162 | Q6UX71        | Q98SJ8 |            |
| O95810        | P02775 | P08567        | P13796 | P27816 | P51884 | Q14019 | Q6Z2N8        | Q9BZA8 |            |
| P00390        | P02776 | P08729        | P14151 | P27824 | P54727 | Q14204 | Q702N8        | Q98ZK3 |            |

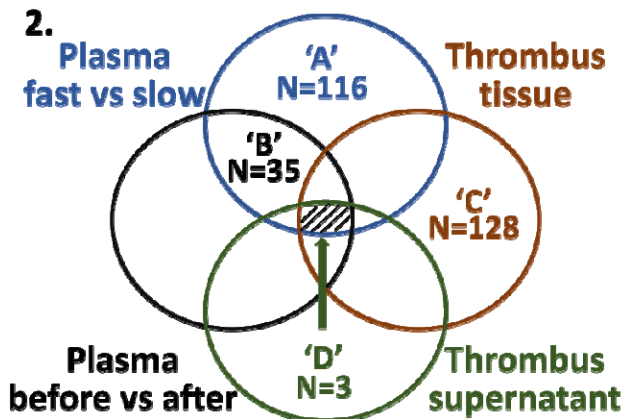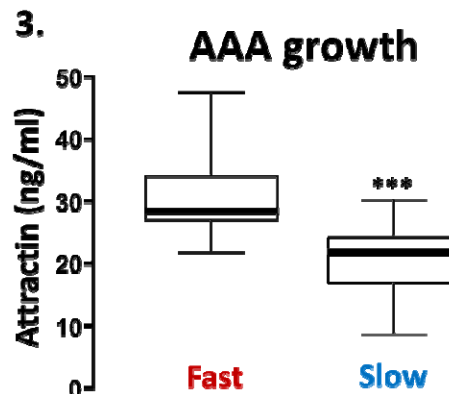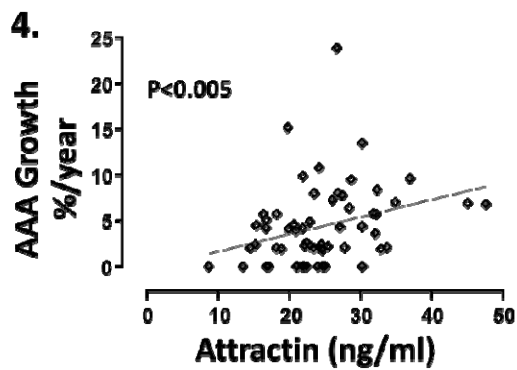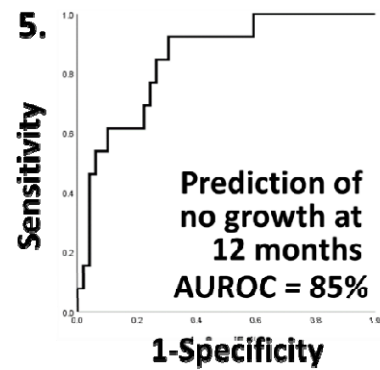



**Figure: Integrated Plasma and Tissue Proteomics Reveals Attractin Release by Intraluminal Thrombus of Abdominal Aortic Aneurysms and Improves Aneurysm Growth Prediction in Humans.**

AAA growth rates were prospectively recorded in 59 patients. Based on the growth rate in the subsequent 12 months, we selected a subset of patients (fastest vs slowest, n=10 each) for the initial discovery analysis. Plasma samples were also collected from patients before and after AAA repair (n=29). Paired aneurysm wall, ILT, omental biopsies were collected intra-operatively during open surgical repair (n=3). In addition to analyses of the tissue, supernatant was obtained from *ex vivo* culture of these paired tissue samples. Samples were subjected to Liquid Chromatography Tandem Mass Spectrometry (LC-MS/MS) proteomic analysis to discover protein level differences. Plasma samples were pooled in their respective groups for analysis. Other samples were analysed individually. LC-MS/MS data were analysed using the Progenesis Q1 software (NonLinear Dynamics) and included only proteins with at least two matched peptide sequences. Comparison between patients with the fastest vs the slowest aneurysm growth showed 116 proteins (listed by the UniProt Protein IDs in Panel 1) to be differentially expressed in their plasma (2-A). Among these proteins, 35 also changed significantly before and after AAA repair (2-B), suggesting their origin from the AAA complex. Comparison of the proteomics profile of aneurysm tissue, ILT, and omental artery showed 128 proteins to be uniquely present in ILT (2-C). Analyses of the tissue culture supernatant further revealed 3 proteins that were: (i) uniquely present in ILT; (ii) released by ILT; (iii) systemic levels reduced after AAA surgery; (iv) different between fast and slow growth AAAs (2-D). These are: attractin (UniProt ID O75882), complement C8 (UniProt ID P07360), heat shock protein AA5P (HSPAA5P, UniProt ID Q58FG0). Attractin level in individual patient was further measured by ELISA (R&D Quantikine DATRN0). Plasma attractin level is significantly higher in patients with fast AAA growth (panel 3, median 28.5 vs 21.9 ng/ml,  $P < 0.001$ ). Plasma attractin level correlates significantly with future AAA growth rate (Figure panel 4, Spearman  $r = 0.35$ ,  $P < 0.005$ ). We regressed the measured values of attractin in combination with AAA diameter against a categorical response with levels of 'Slow/no' growth (0%) or growth (>0% growth) for outcomes at 12 months. Using attractin and AAA diameter as input variables, the AUROC for predicting no growth of AAA at 12 months is 85% (panel 5, asymptotic  $P < 0.001$ ).
